# Supplementary material for: Clinicoradiologic Differences between Orbital Schwannoma and Cavernous Venous Malformation: A Retrospective Comparative Case Series
Source: Research Square preprint supplement (doi:10.21203/rs.3.rs-5144636/v1), 2024-10-23
Supplement: Supplementary file 1 [file 204e79f9b71fb090e2789aa2.docx]

**Table legends**

**Table 1.** Patient demographics and symptomatology

|  | **Orbital schwannoma** | **Cavernous venous malformation** | ***P*-value** |
| --- | --- | --- | --- |
| **Demographics** |  |  |  |
| Age, mean ± SD | 45.0 ± 16.7 years | 50.2 ± 8.6 years | 0.305 |
| Sex, No. (%) |  |  | 0.908 |
| Female | 7 (53.8%) | 16 (61.5%) |  |
| Male | 6 (46.2%) | 10 (38.5%) |  |
| Laterality, No. (%) |  |  | 0.571 |
| Left | 5 (38.5%) | 14 (53.8%) |  |
| Right | 8 (61.5%) | 12 (46.2%) |  |
| **Presenting symptom,**  **No. (%)** |  |  | 0.201 |
| Decreased vision | 1 (7.7%) | 1 (3.8%) |  |
| Diplopia | 1 (7.7%) | 0 (0%) |  |
| Eye discomfort | 0 (0%) | 1 (3.8%) |  |
| Headache | 2 (15.4%) | 3 (11.5%) |  |
| None (incidental) | 1 (7.7%) | 5 (19.2%) |  |
| Palpable mass | 1 (7.7%) | 4 (15.4%) |  |
| Proptosis | 7 (53.8%) | 12 (46.2%) |  |
| **Clinical findings** |  |  |  |
| Choroidal folds,  No. (%) | 2 (15.4%) | 1 (3.7%) | 0.524 |
| Extraocular motility limitation, No. (%) | 3 (23.1%) | 3 (11.5%) | 0.638 |
| Globe dystopia,  No. (%) |  |  | 0.285 |
| Hyperglobus | 0 (0%) | 1 (3.8%) |  |
| Hypoglobus | 1 (7.7%) | 0 (0%) |  |
| Palpable mass,  No. (%) | 2 (15.4%) | 12 (46.2%) | 0.125 |
| Papilledema | 3 (23.1%) | 1 (3.8%) | 0.191 |
| Proptosis, No. (%); | 11 (84.6%) | 13 (50.0%) | 0.081 |
| Proptosis, mean  (mm) ± SD | 3.0 ± 1.97 | 2.5 ± 1.64 | 0.704 |
| Strabismus, No. (%) | 0 (0%) | 3 (11.5%) | 0.524 |
| Visual deficit, No. (%) | 7 (53.8%) | 17 (65.4%) | 0.727 |
| Presenting VA  (decimal) mean ± SD | 0.8 ± 0.24 | 0.8 ± 0.29 | 0.767 |

**Table 2.** Comparative Analysis of Radiologic Features between Orbital schwannoma and Cavernous venous malformation

|  | **Orbital schwannoma** | **Cavernous venous**  **malformation** | ***P*-value** |
| --- | --- | --- | --- |
| **Location, No. (%)** |  |  | 0.909 |
| Extraconal | 5 (38.5%) | 12 (46.2%) |  |
| Intraconal | 8 (61.5%) | 14 (53.8%) |  |
| **Size (greatest diameter)**  **mean (mm) ± SD** | 21 ± 7 | 20 ± 5 | 0.441 |
| **Margin** |  |  | 0.141 |
| Lobulated | 4 (30.8%) | 16 (61.5%) |  |
| Smooth | 9 (69.2%) | 10 (38.5%) |  |
| **T2 signal intensity** |  |  | 0.498 |
| Hyperintense | 8 (61.5%) | 19 (73.1%) |  |
| Hypointense | 0 (0%) | 1 (3.8%) |  |
| Isointense | 5 (38.5%) | 6 (23.1%) |  |
| **T2 homogeneity** |  |  | **0.044*** |
| Heterogenous | 13 (100.0%) | 17 (65.4%) |  |
| Homogenous | 0 (0%) | 9 (34.6%) |  |
| **Linear T2 hypointensity** | 1 (7.7%) | 15 (57.7%) | **0.008*** |
| **Early phase**  **enhancement** |  |  | **<0.001*** |
| Nodular | 0 (0%) | 23 (92.0%) |  |
| Diffuse | 10 (100%) | 2 (8.0%) |  |
| **Enhancement pattern** |  |  | 0.160 |
| Plateau | 2 (18.2%) | 0 (0%) |  |
| Progressive | 9 (81.8%) | 25 (100.0% |  |
| Wash-out | 0 (0%) | 0 (0%) |  |
| **Delayed phase**  **enhancement** |  |  | 0.490 |
| Heterogenous | 11 (91.7%) | 19 (76.0%) |  |
| Homogenous | 1 (8.3%) | 6 (24.0%) |  |
| **Tail sign** | 6 (46.2%) | 0 (0%) | **0.001*** |
| **Target sign** | 6 (46.2%) | 0 (0%) | **0.001*** |
| **ADC value,** x 10-3 mm2/s  mean (range) | 1.64 (0.90–2.43) | 1.26(0.69–1.58) | 0.078 |
| **Median CT value,** HU (range) | 40 (21-50) | 56 (41-120) | **0.001**† |

*Fisher’s exact test

† Student’s T-test

**Table 3.** Type of surgery and incidence of recurrence

|  | **Orbital schwannoma** | **Cavernous venous**  **malformation** |
| --- | --- | --- |
| **Type of surgery** |  |  |
| Entire surgical removal  without capsule violation | 10 (76.9%) | 26 (100%) |
| Sub-total resection | 3 (23.1%) | 0 (0%) |
| + Bony marginotomy | 3 (23.1%) | 2 (7.7%) |
| **Recurrence** | 0 (0%) | 0 (0%) |
| **Follow up, mean**  **(years) ± SD** | 4.3 ± 3.4 | 0.87 ± 0.88 |
